# Supplementary material
Source: PubMed Central journal article supplement (PMC5994197)
Supplement: NIHMS966021-supplement-supplement_1.pdf [file NIHMS966021-supplement-supplement_1.pdf]

1

| Factor              | COPDGene                    |              | ECLIPSE              |         |
|---------------------|-----------------------------|--------------|----------------------|---------|
|                     | Coefficient (95% CI)        | p value      | Coefficient (95% CI) | p value |
| <b>log(LAA950)*</b> | <b>-0.26 (-0.43, -0.08)</b> | <b>0.005</b> | -0.07 (-0.17,-0.03)  | 0.19    |
| <b>Perc15*</b>      | <b>4.68 (1.53, 7.82)</b>    | <b>0.004</b> | 1.55 (-1.22,4.32)    | 0.27    |
| <b>SGRQ</b>         | <b>3.00 (0.61-5.38)</b>     | <b>0.014</b> | -1.99 (-4.19, 0.21)  | 0.07    |

2

3 Supplementary Table 1. Quantitative chest CT emphysema and SGRQ score in COPD  
4 subjects with eosinophil counts  $\geq 300$  cells/ $\mu$ L. For log(LAA950) and Perc15, a subset of  
5 subjects with quantitative CT data were analyzed (COPDGene n= 1119, ECLIPSE n=  
6 1610) .Linear regression models are adjusted for age, sex, race, smoking status, BMI,  
7 CT scanner model and WBC. For SGRQ, linear regression models are adjusted for age,  
8 sex, race, and pack years smoking history.

9 LAA950 = low attenuation area at  $<950$ HU; Perc15 = 15<sup>th</sup> percentile of the lung density  
10 histogram; SGRQ = Saint George's Respiratory Questionnaire total score.

11

12

13

14

15

16

17

18

| Number of Exacerbations in prior year | Annual exacerbation rate during longitudinal follow up |                                      |
|---------------------------------------|--------------------------------------------------------|--------------------------------------|
|                                       | Eosinophil < 300 cells/ $\mu$ L                        | Eosinophil $\geq$ 300 cells/ $\mu$ L |
| 0                                     | 0.29                                                   | 0.35                                 |
| 1                                     | 0.81                                                   | 0.79                                 |
| $\geq$ 2                              | 1.42                                                   | 2.39                                 |

19 (A)

20

| Number of exacerbation in prior year | Annual exacerbation rate        |                                      |                                 |                                      |
|--------------------------------------|---------------------------------|--------------------------------------|---------------------------------|--------------------------------------|
|                                      | 1 year                          |                                      | Overall study period            |                                      |
|                                      | Eosinophil < 300 cells/ $\mu$ L | Eosinophil $\geq$ 300 cells/ $\mu$ L | Eosinophil < 300 cells/ $\mu$ L | Eosinophil $\geq$ 300 cells/ $\mu$ L |
| 0                                    | 0.62                            | 0.63                                 | 0.40                            | 0.38                                 |
| 1                                    | 1.40                            | 1.51                                 | 1.00                            | 1.12                                 |
| $\geq$ 2                             | 2.05                            | 2.97                                 | 1.61                            | 2.41                                 |

21 (B)

22

23 Supplementary Table 2. Annual exacerbation rate in subgroups stratified by prior  
 24 exacerbation frequency and blood eosinophil counts. (A) COPDGene Longitudinal  
 25 Follow-up Study, (B) ECLIPSE one year and overall study period.

| ECLIPSE overall study period                             |                                                             |                  |                                                                     |                  |
|----------------------------------------------------------|-------------------------------------------------------------|------------------|---------------------------------------------------------------------|------------------|
| Factors associated with exacerbation rate                | Persistently elevated vs. low eosinophils (n= 90 vs. n=784) |                  | Persistently elevated vs. fluctuating eosinophils (n= 90 vs. n=471) |                  |
|                                                          | IRR (95% CI)                                                | p value          | IRR (95% CI)                                                        | p value          |
| Age                                                      | 1.00(0.99-1.02)                                             | 0.75             | 1.00(0.99-1.02)                                                     | 0.89             |
| Non White race                                           | 0.76(0.41-1.34)                                             | 0.36             | 0.90(0.36-1.90)                                                     | 0.80             |
| <b>Female</b>                                            | <b>1.29(1.06-1.57)</b>                                      | <b>0.009</b>     | <b>1.38(1.10-1.73)</b>                                              | <b>0.004</b>     |
| <b>SGRQ total score*</b>                                 | <b>1.01(1.01-1.02)</b>                                      | <b>&lt;0.001</b> | <b>1.01(1.00-1.01)</b>                                              | <b>0.02</b>      |
| <b>Post-bronchodilator FEV<sub>1</sub> % predicted †</b> | <b>0.98(0.97-0.98)</b>                                      | <b>&lt;0.001</b> | <b>0.99(0.98-0.99)</b>                                              | <b>&lt;0.001</b> |
| <b>GERD</b>                                              | <b>1.32(1.07-1.62)</b>                                      | <b>0.008</b>     | <b>1.43(1.14-1.79)</b>                                              | <b>0.002</b>     |
| Current smoking                                          | 1.10(0.89-1.35)                                             | 0.39             | 1.19(0.94-1.52)                                                     | 0.16             |
| <b>previous exacerbations</b>                            | <b>2.77(2.27-3.39)</b>                                      | <b>&lt;0.001</b> | <b>3.00(2.38-3.82)</b>                                              | <b>&lt;0.001</b> |
| WBC                                                      | 1.00(0.95-1.05)                                             | 0.99             | 1.04(0.99-1.09)                                                     | 0.1              |
| <b>Persistent eosinophils ≥ 300</b>                      | <b>1.48(1.11-1.96)</b>                                      | <b>0.007</b>     | <b>1.39(1.07-1.80)</b>                                              | <b>0.01</b>      |

26

27 Supplementary Table 3. Persistent eosinophilia and exacerbation risk in ECLIPSE.

28 Risk of exacerbation in subjects with persistently elevated eosinophils compared to  
 29 persistently low eosinophils and in subjects with persistently elevated eosinophils  
 30 compared to fluctuating eosinophils.

31 \*per 1 point increase in score, †per percentage point increase in FEV<sub>1</sub>.

32

33

34

35

| Factor                                  | COPDGene                |                  | ECLIPSE                 |                  |
|-----------------------------------------|-------------------------|------------------|-------------------------|------------------|
|                                         | Odds Ratio (95% CI)     | p value          | Odds Ratio (95% CI)     | p value          |
| <b>Age</b>                              | <b>0.95 (0.93-0.97)</b> | <b>&lt;0.001</b> | <b>0.94 (0.92-0.96)</b> | <b>&lt;0.001</b> |
| <b>Female</b>                           | <b>1.68 (1.22-2.32)</b> | <b>0.001</b>     | <b>2.16 (1.54-3.03)</b> | <b>&lt;0.001</b> |
| Non White race                          | 1.37 (0.93-1.99)        | 0.11             | <b>2.69 (1.10-6.08)</b> | <b>0.02</b>      |
| <b>BMI</b>                              | <b>1.03 (1.00-1.05)</b> | <b>0.03</b>      | <b>1.04 (1.01-1.07)</b> | <b>0.007</b>     |
| <b>Smoking (PY)</b>                     | <b>0.99 (0.98-0.99)</b> | <b>0.01</b>      | <b>0.99 (0.98-0.99)</b> | <b>0.03</b>      |
| <b>Eosinophil <math>\geq 300</math></b> | <b>1.51 (1.04-2.18)</b> | <b>0.03</b>      | <b>1.69(1.15-2.48)</b>  | <b>0.007</b>     |

36

37 Supplementary Table 4. Association between asthma-COPD overlap and eosinophilic  
38 COPD, defined as blood eosinophil count  $\geq 300$  cells/ $\mu$ L. Odds ratio derived from  
39 logistic regression. Asthma-COPD overlap defined based on doctor's diagnosis of  
40 asthma before age of 40<sup>1</sup>.

- 41 1. Hardin M, Cho M, McDonald M-L, Beaty T, Ramsdell J, Bhatt S, et al. The clinical  
42 and genetic features of COPD-asthma overlap syndrome. *Eur Respir J*.  
43 2014;44:341–50.

44

45

46

47

48

49

50

51

52

53

54

55

56

57

Supplementary Figure 1. Study design and populations. COPD: chronic obstructive pulmonary disease, GOLD: Global initiative for chronic Obstructive Lung Disease, NA: not available

Supplementary Figure 2. Receiver operating characteristic (ROC) curve for eosinophil cutoff of 300 cells/ $\mu$ L in COPDGene. ROC analysis was based on logistic regression models (0 vs. any exacerbation history) adjusted for age, sex, race, gastroesophageal reflux, Saint George's Respiratory Questionnaire score, current smoking, post bronchodilator forced expiratory volume at 1 second percent predicted, white blood cell count, and eosinophil counts ranging from 100 to 400 cells/ $\mu$ L.

Supplementary Figure 3. Receiver operating characteristic (ROC) curve for eosinophil cutoff of 300 cells/ $\mu$ L in ECLIPSE. ROC analysis was based on logistic regression models (exacerbation rate  $\geq 1$  during overall study period vs. less than 1) adjusted for age, sex, race, previous exacerbation, gastroesophageal reflux, Saint George's Respiratory Questionnaire score, current smoking, post bronchodilator forced expiratory volume at 1 second percent predicted, white blood cell count, and eosinophil counts ranging from 100 to 400 cells/ $\mu$ L.

Supplementary Figure 4. Eosinophil cutoffs in COPD subjects not using inhaled corticosteroid. Risk estimates are derived from negative binomial regression models adjusted for age, sex, race, gastroesophageal reflux, Saint George's Respiratory Questionnaire score, current smoking, post bronchodilator forced expiratory volume at 1 second percent predicted, and white blood cell count. IRR: incidence rate ratio.

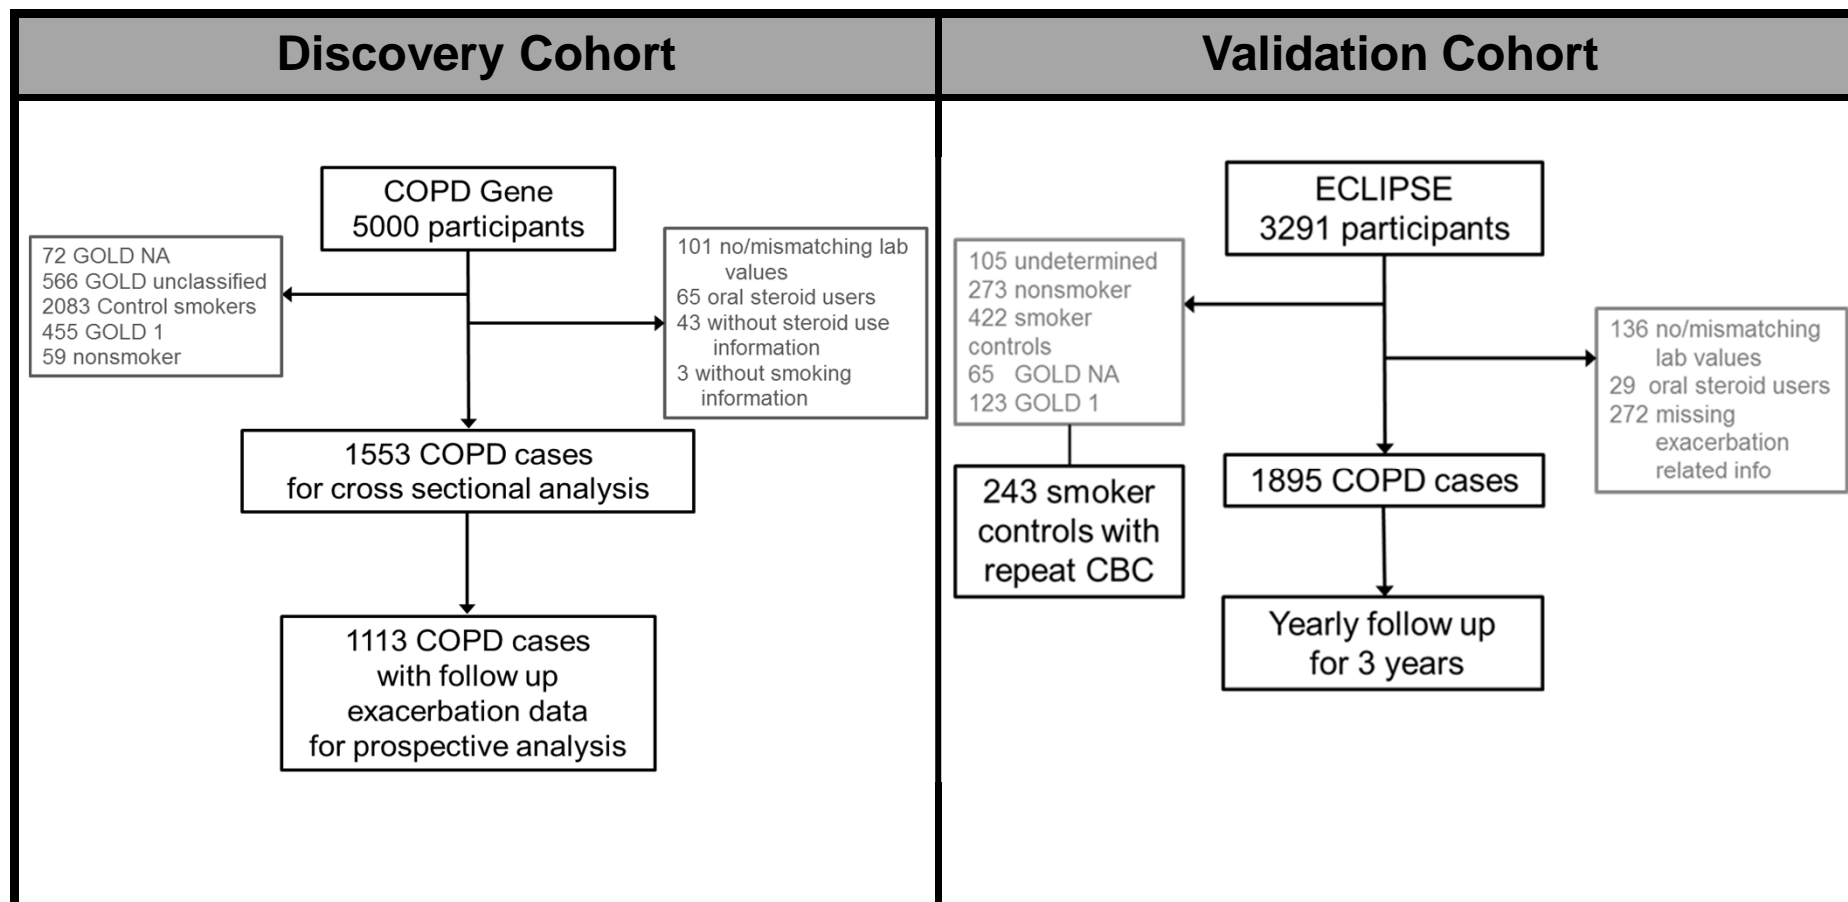

**Supplementary Figure 1.**

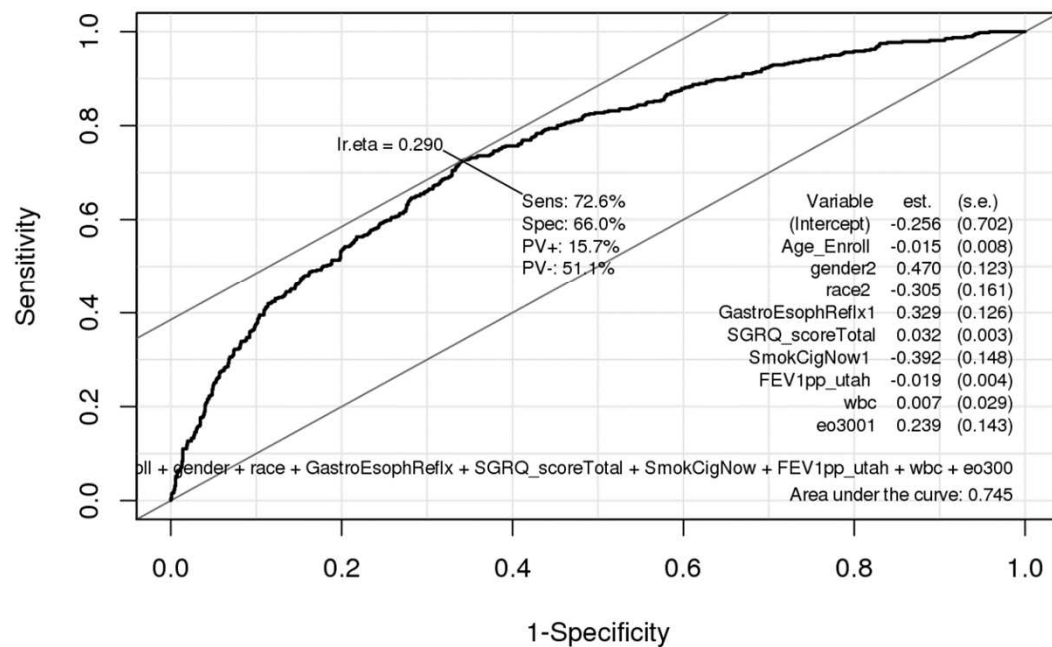

| Eosinophil Cutoffs | Area under the curve | Sensitivity | Specificity |
|--------------------|----------------------|-------------|-------------|
| 100 cells/ $\mu$ L | 0.743                | 66.5        | 70.6        |
| 200 cells/ $\mu$ L | 0.744                | 65.7        | 71.8        |
| 300 cells/ $\mu$ L | 0.745                | 72.6        | 66.0        |
| 340 cells/ $\mu$ L | 0.744                | 70.1        | 67.0        |
| 400 cells/ $\mu$ L | 0.745                | 71.1        | 66.2        |

**Supplementary Figure 2.**



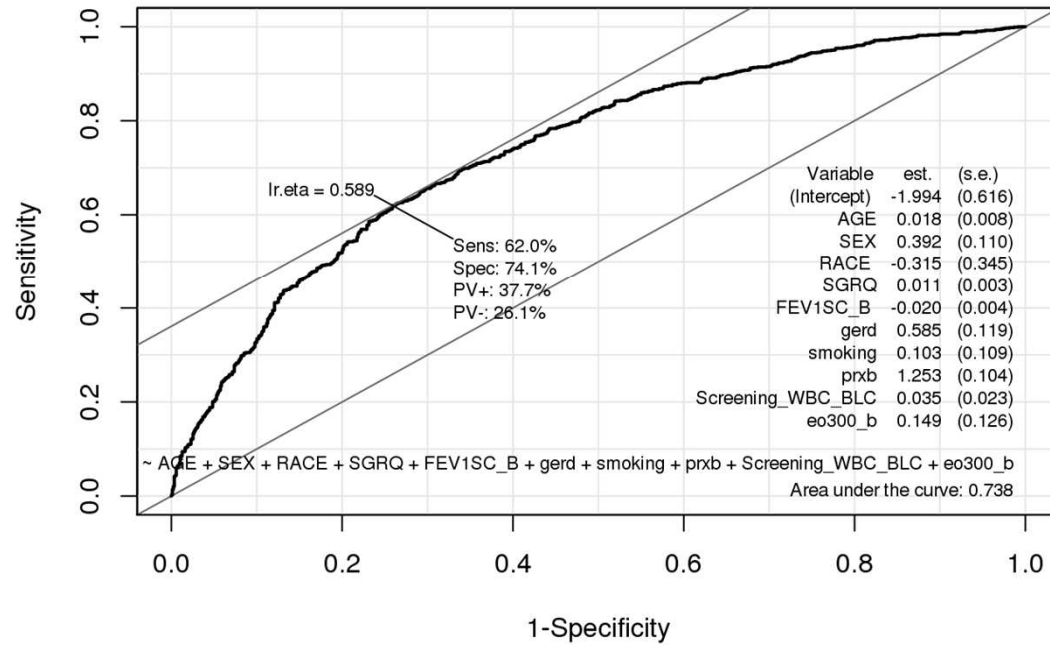

| Eosinophil Cutoffs | Area under the curve | Sensitivity | Specificity |
|--------------------|----------------------|-------------|-------------|
| 100 cells/ $\mu$ L | 0.738                | 61.1        | 74.9        |
| 200 cells/ $\mu$ L | 0.738                | 60.6        | 75.4        |
| 300 cells/ $\mu$ L | 0.738                | 62          | 74.1        |
| 340 cells/ $\mu$ L | 0.738                | 62.7        | 73.4        |
| 400 cells/ $\mu$ L | 0.738                | 61.1        | 74.9        |

**Supplementary Figure 3.**

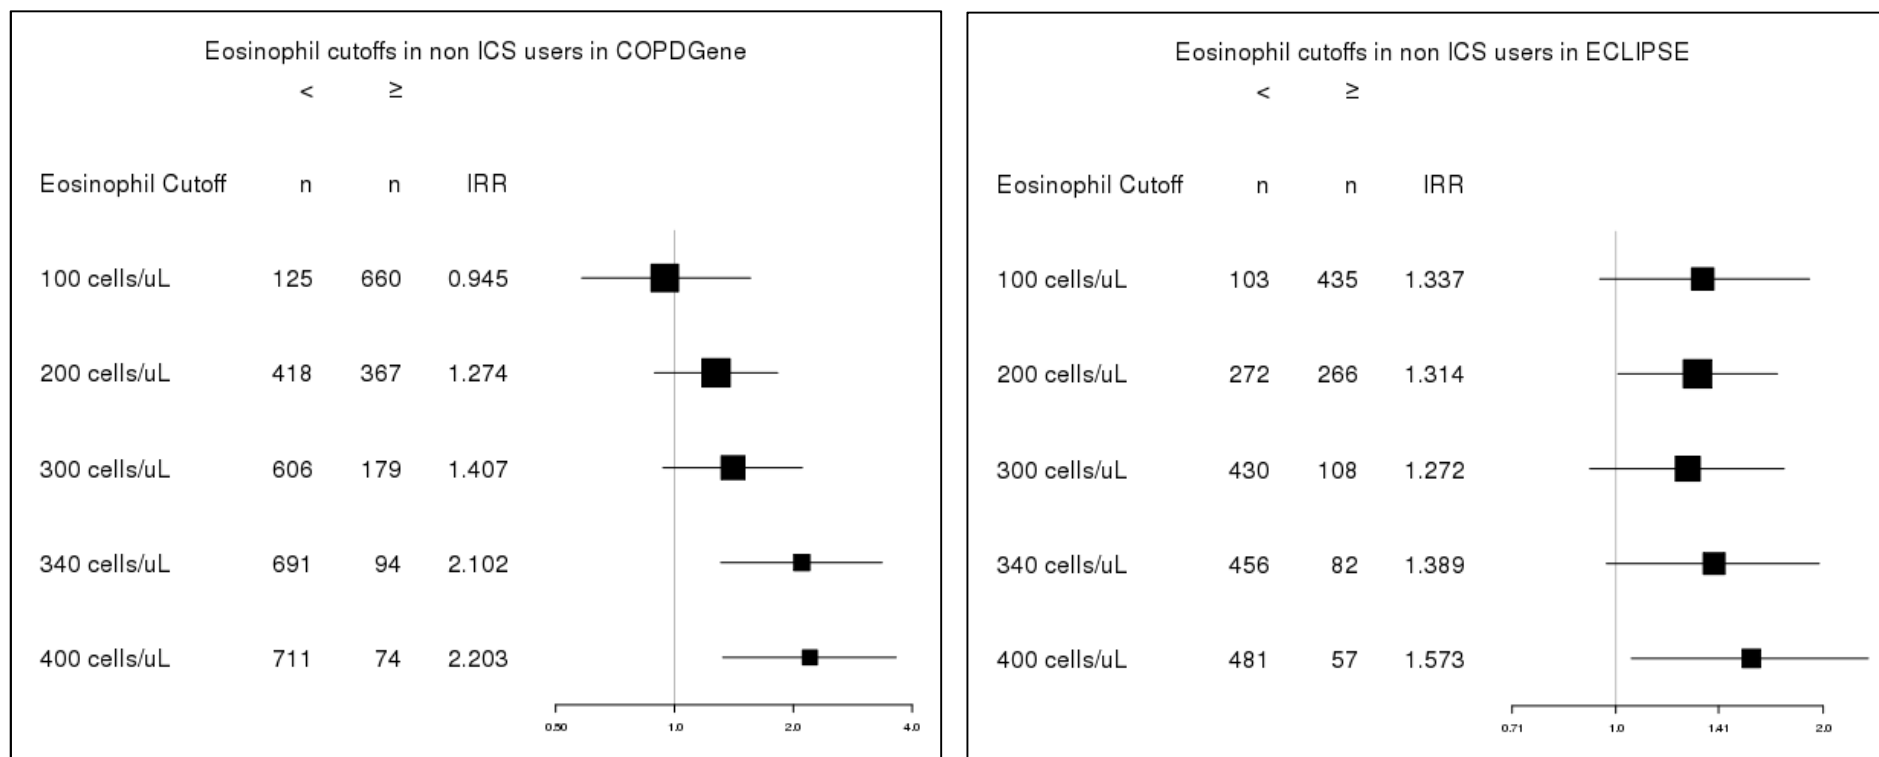

**Supplementary Figure 4.**
